## 1 Title

2 Single cell genome sequencing of laboratory mouse microbiota improves taxonomic and  
3 functional resolution of this model microbial community

4

## 5 Authors

6 Svetlana Lyalina<sup>1</sup>, Ramunas Stepanauskas<sup>2</sup>, Frank Wu<sup>1</sup>, Shomyseh Sanjabi<sup>1,3</sup>, Katherine S.  
7 Pollard<sup>1,4,5\*</sup>

8

9 1 Gladstone Institutes, San Francisco, CA, USA

10 2 Bigelow Laboratory for Ocean Sciences, East Boothbay, ME, USA

11 3 Department of Microbiology & Immunology, University of California, San Francisco, San Francisco,  
12 CA, USA

13 4 Department of Epidemiology & Biostatistics, Institute for Human Genetics, and Institute for  
14 Computational Health Sciences, University of California, San Francisco, San Francisco, CA, USA

15 5 Chan-Zuckerberg Biohub, San Francisco, CA, USA

16 \* Corresponding author, [katherine.pollard@gladstone.ucsf.edu](mailto:katherine.pollard@gladstone.ucsf.edu)

17

## 18 Abstract

19 Laboratory mice are widely studied as models of mammalian biology, including the  
20 microbiota. However, much of the taxonomic and functional diversity of the mouse gut  
21 microbiome is missed in current metagenomic studies, because genome databases have not  
22 achieved a balanced representation of the diverse members of this ecosystem. Towards solving  
23 this problem, we used flow cytometry and low-coverage sequencing to capture the genomes of  
24 764 single cells from the stool of three laboratory mice. From these, we generated 298 high-  
25 coverage microbial genome assemblies, which we annotated for open reading frames and  
26 phylogenetic placement. These genomes increase the gene catalog and phylogenetic breadth  
27 of the mouse microbiota, adding 135 novel species with the greatest increase in diversity to the  
28 *Muribaculaceae* and *Bacteroidaceae* families. This new diversity also improves the read  
29 mapping rate, taxonomic classifier performance, and gene detection rate of mouse stool  
30 metagenomes. The novel microbial functions revealed through our single-cell genomes highlight  
31 previously invisible pathways that may be important for life in the murine gastrointestinal tract.

32

## 33 Introduction

34 The number of microbial species with at least one genome sequence has grown rapidly  
35 in recent years. The human gut has been a major focus of these efforts[1–5], with metagenome  
36 assembled genomes (MAGs) and innovations in culturing[6–8] capturing genomes for many  
37 species previously absent from databases built primarily through isolate sequencing.

38 Mice are a model system for host-associated microbiota. They are heavily utilized in  
39 biomedical research as well as basic science investigations of community assembly and  
40 resilience. However, the species present in wild and laboratory mouse stool are heavily under-

41 represented in genome databases in comparison to human-associated microbiota[9]. This gap  
42 can create a biased picture of the functional and taxonomic landscape of shotgun metagenomic  
43 studies carried out in mice, since most bioinformatics methods rely on available reference data.  
44 Several research groups have actively sought to address this problem, both by focusing on  
45 mouse-specific bacterial strains that were previously unculturable[10] and by performing co-  
46 assembly of large-scale metagenomic datasets from a broad variety of mouse facilities[11].

47 This study aims to increase the number of mouse gut species with a sequenced genome  
48 using microbial single-cell genomics (SCG). Our workflow leverages fluorescence-activated cell  
49 sorting (FACS), whole genome amplification with WGA-X, shotgun sequencing and *de novo*  
50 assembly of genomes from individual microbial cells from two laboratory mouse strains[12]. By  
51 annotating the taxonomy and encoded functions of 298 quality-controlled, single-cell genomes,  
52 we revealed previously invisible pathways and phylogenetic breadth, increasing the power of  
53 metagenomic analysis tools. These results demonstrate the utility of SCG for characterizing  
54 host-associated microbiomes and provide a resource towards a better understanding of the  
55 mouse gut as a model system.

## 56 Results

57 The biological material used for this study came from fecal pellets of three mice of two  
58 different strains - two wild-type C57BL/6N mice and a transgenic CD4-dnT $\beta$ RII (DNR) mouse  
59 prone to developing intestinal inflammation[13]. These two strains' intestinal microbiota have  
60 been previously studied within the lab[14], which allowed us to evaluate how the single-cell  
61 genomes we produced change previous interpretations of shotgun metagenomic data.

62 Using stool from these mice, we performed FACS followed by whole genome  
63 amplification with WGA-X. Cell sorting was based on the fluorescence of nucleic acids stain  
64 SYTO-9 (Thermo Fisher Scientific) and light scatter signals using a previously established gate

65 for individual prokaryotic cells[12]. To assess the general structure of the microbiomes, we first  
66 performed low-coverage sequencing and assembly of 738 cells (median 765,918 reads/sample  
67 [342,424 - 2,670,861]) (Methods). We filtered the resulting single-cell amplified genomes (SAGs)  
68 to exclude assemblies with total length below 20,000 basepairs (bp) or suspected to be  
69 contaminated (determined by nucleotide tetramer principal components analysis[15]), producing  
70 697 SAGs that vary in quality and completeness (Fig 1). Compared to the earlier, multiple  
71 displacement amplification (MDA) technique[16], the WGA-X approach has been shown to  
72 improve the amplification of single-cell DNA, especially for microorganisms with high GC-  
73 content genomes[12], and we indeed observed a wide range of GC% across the assemblies  
74 (Fig 1E).

75

76 **Fig 1. Quality metrics of low-coverage SAG assemblies.** A faceted plot containing  
77 histograms of quality metrics used to describe the assembled SAGs. The facets display the  
78 following metrics: A) total number of contigs, B) their total assembled lengths (in number of  
79 nucleotide basepairs), C) the length of the longest contig in each assembly (in number of  
80 nucleotide basepairs), D) CheckM estimated completeness (as percentage), and E) GC content.  
81 Tukey five-number summaries (minimum, 25% quantile, median, 75% quantile, maximum) are  
82 overlaid on each metric's panel.

83

84 We next selected two samples, one of each strain, for further sequencing towards  
85 obtaining high-coverage SAGs. To prioritize cells that would produce high-quality data and  
86 increase the taxonomic diversity of mouse gut genomes, we performed phylogenetic placement  
87 of the low-coverage SAGs with GTDB-Tk[17], successfully placing 448 SAGs within the GTDB  
88 genome tree of life[18] (release 86). We then selected the 150 SAGs from each sample that  
89 maximize phylogenetic diversity and excluded SAGs with low probability of high genome  
90 recovery (Methods). Further sequencing and assembly of DNA from the corresponding cells

91 produced 298 high-coverage SAGs after quality control. As expected, these show significant  
92 improvements in relevant quality metrics when compared to corresponding low-coverage  
93 assemblies (S1 Fig). All subsequent analyses use the high-coverage SAGs.

94

95 To evaluate whether the SAGs increased the diversity of sequenced mouse microbiota,  
96 we placed them on the GTDB tree and quantified the additional branch length added by SAGs  
97 compared to the total branch length from previously sequenced microbial samples. Evaluating  
98 this metric across clades, we observed that our SAGs primarily increase the phylogenetic  
99 diversity of the *Muribaculaceae* and *Bacteroidaceae* families (Fig 2). Despite the fact that GTDB  
100 includes MAGs from uncultured microbes, this study adds substantial new diversity to the tree,  
101 with 135 out of 298 SAGs having no hit in the GTDB with FastANI similarity above 97%.

102

103 **Fig 2. SAGs increase phylogenetic diversity and contain distinct genomic features.** The  
104 central part of this circular figure contains a heat tree reflecting the number of SAG assemblies  
105 placed at different sub-branches of the GTDB v86 bacterial genome tree (represented by node  
106 size), and percentage phylogenetic gain achieved by the insertion of the new genome  
107 assemblies (represented by color scale). The outer rings of the figure contain additional  
108 genomic feature information inferred about the successfully placed SAG assemblies. The  
109 additional markings denote predicted CRISPR-Cas system type (ring of single point symbols)  
110 and the number of genes contributing to predicted biosynthetic gene clusters (outermost ring of  
111 colored polygons).

112

113

114 Next, we investigated the gene content of the SAGs. We annotated open reading  
115 frames in all SAGs, dereplicated these, and analyzed their functional potential using annotations  
116 from clusters of orthologous groups (COGs)[19]. Gene sequences were evaluated for percent

117 nucleotide identity to all sequences in a previously published mouse stool metagenome-derived  
118 gene catalog (4) and labeled as novel if they have no matches above 95% nucleotide identity.  
119 Overall, 53.7% of SAG genes were novel and 46.3% overlapped with the mouse catalog, which  
120 compares to 10% overlap with a human gene catalog and <0.1% for a marine catalog (Fig 3),  
121 highlighting the functional differences of microbes across these environments. Novel SAG  
122 genes were enriched for COG categories M (Cell wall/membrane/envelope biogenesis), L  
123 (Replication, recombination and repair), C (Energy production and conversion) and R (General  
124 function prediction only). This enrichment was determined by Annotation Enrichment  
125 Analysis[20], a method that aims to reduce the bias towards highly annotated functional  
126 categories and utilize the hierarchical structure in a given functional ontology. While these  
127 annotation categories provide a rather broad summary of the functions distinct to this gene set,  
128 they generally suggest that sequencing more members of the microbiota would expand our  
129 understanding of both internal housekeeping functions (categories L and R), but also functions  
130 more pertinent for translational applications within category M, which contains potential  
131 candidates for studying interactions with the host immune system. Thus, our SAG gene catalog  
132 expands the representation of putative functions present in mouse gut microbes, with  
133 surprisingly large gains given the number of genomes sequenced for this study.

134

135 **Fig 3. A gene catalog derived from SAGs shows substantial novelty when compared**  
136 **against other microbiome gene catalogs.** Euler plots reflect the shared and unique counts of  
137 genes when comparing the set of non-redundant genes from this study's data against previously  
138 published gene catalogs derived from metagenomic sequencing efforts in A) mice, B) humans,  
139 and C) marine samples.

140

141 To expand beyond COG annotations for two important groups of genes, we performed  
142 additional annotation of enzymes involved in secondary metabolism and CRISPR associated

143 (Cas) proteins along with their CRISPR arrays. Overall, 3,257 putative secondary metabolism  
144 gene clusters were found across the 298 SAGs sequenced at high coverage. The most  
145 prevalent predicted cluster types were the broad categories of saccharide, fatty acid, and  
146 NRPS-like, whereas the more nuanced product types were detected much more rarely.  
147 CRISPR-cas types were determined in 88 genomes, of which 22 genomes had 2 CRISPR  
148 complexes. An additional 28 genomes had Cas operons, but no proximal CRISPR array.

149         The distributions of biosynthetic gene clusters (BGCs) and CRISPR-Cas systems in our  
150 SAGs support the phylogenetic novelty of several clades characterized in this study. We  
151 quantified the presence of BGCs and CRISPR-cas types in relation to the phylogenetic  
152 placement of the contributing genome (outer ring of Fig 3). In this trimmed genome subtree, the  
153 newly sequenced *Prevotella* SAGs form a distinct, relatively flat phylogenetic subcluster,  
154 distinguished by unique CRISPR-Cas subtype patterns and presence of NRPS-like predicted  
155 BGCs. A closely related subset of SAGs assigned to the genus CAG-486 within the  
156 *Muribaculaceae* family accounts for a high proportion of identified aryl polyene BGCs,  
157 suggesting similar adaptations to oxidative stress[21]. Thus, the new taxonomic diversity we  
158 captured is mirrored by gene functional profiles that differ from related genomes.

159         Finally, we investigated to what degree our SAGs improve the sensitivity and resolution  
160 of metagenomic analysis using 236 shotgun metagenome samples from laboratory mouse stool,  
161 as well as metagenomes from wild mouse stool (N=10), human stool (N=274), and marine  
162 environments (N=20, subset of full data) (accessions listed in S2 Table). Focusing on taxonomic  
163 classifiers, we created custom mapping references for sourmash[22] and MIDAS[9], which  
164 represent two common approaches: kmer-based versus marker gene-based. We compared  
165 taxonomic coverage and prevalence estimates with each tool using the database distributed  
166 with the software, a database composed only of SAGs, and the two combined. For both tools,  
167 the combined database generally improved the taxonomic classification of mouse microbiome  
168 samples, with the exception of the wild mouse microbiome testing scenario, which only showed

169 improvement with  $FDR < 0.1$  when using sourmash and not MIDAS. Interestingly the addition of  
170 SAGs also improved classification rates to a limited degree with human microbiome samples  
171 (not statistically significant), but not marine samples. The results of non-parametric testing of the  
172 performance of pairs of databases for each dataset and tool type can be found in S3 Table, with  
173 highlighted rows showing cases of significant performance improvement in a number of murine  
174 shotgun microbiome datasets. Ridgeline plots graphically portray these performance differences  
175 in greater detail (S4 Fig, S5 Fig). These results show that the novel phylogenetic diversity we  
176 captured with SAGs has a positive effect on our ability to taxonomically profile shotgun  
177 metagenomes from the mammalian gut.

178

179

## 180 Discussion

181 To our knowledge, this study is the first to generate single-cell genome assemblies from  
182 mammal-associated microbiota with the WGA-X approach. The draft genomes that we  
183 assembled increase the phylogenetic diversity of mouse gut microbiota in public databases. Our  
184 SAGs add a particularly large number of genomes (58 assemblies) to the recently proposed  
185 candidate family *Muribaculaceae* within the Bacteroidales, previously referred to in the literature  
186 as S24-7 and Ca. Homeothermaceae[23][24]. This family has been reported as a taxon of  
187 interest in multiple studies[25–27] but has so far only been characterized via 16S markers and  
188 MAGs. Only one recent paper has successfully isolated members of this family in culture[24].  
189 Another taxon with large numbers of newly placed SAGs (120 assemblies), though small  
190 phylogenetic gain (4.27%), is the genus *Prevotella*, which contains Gram-negative obligate  
191 anaerobes with potential links to mucosal inflammation susceptibility[28]. Hence, our SAGs add  
192 genomes for important taxonomic groups in the mouse microbiota.



193 SAGs also increase our knowledge of the functional potential of microbes in the mouse  
194 gut. Gain in functional novelty includes a large number of COGs that were enriched and  
195 depleted compared to open reading frames previously observed in mouse stool samples. When  
196 summarising these differentially detected functional categories, four are particularly enriched:  
197 energy production and conversion (C), replication and repair (L), cell wall/membrane/envelope  
198 biogenesis (M), and the unspecific category (R) - general function prediction only. Previously  
199 unobserved sequences classified under the M category could be of interest when mining for  
200 new antigenic proteins, whereas genes placed in the unspecific R category could be further  
201 experimentally probed to shed light on microbial “dark matter”.

202 Our annotations of SAGs for secondary metabolism genes and CRISPR systems aim to  
203 highlight the capacity of this sequencing approach to more faithfully reflect intra-genome  
204 structure. When analyzed in the context of phylogenetic relationships between SAGs, the  
205 results of CRISPR-Cas type identification show SAGs placed in the *Prevotella* genus have both  
206 Type I and Type III systems, whereas this is relatively uncommon in our data outside this clade.  
207 This suggests that these microbes have a more sophisticated defense repertoire that allows for  
208 targeting of both DNA and RNA[30].

209 Looking at secondary metabolism, we see that the most widely represented gene  
210 clusters are for saccharide and fatty acid biosynthesis. The remaining categories are sparsely  
211 observed. An interesting clustering occurs for the resorcinol group which appears primarily to be  
212 present in genomes from the *Bacteroidaceae* family. This cluster type originates mainly from  
213 genomes found in the DNR mouse microbiome (34 resorcinol clusters predicted, vs only 6 from  
214 WT). The particular gene that is considered by the predictive tool AntiSMASH as a signature  
215 gene for the resorcinol annotation is DarB (KEGG orthology ID of K00648), which falls under the  
216 fatty acid biosynthesis KEGG pathway. The literature provides limited insight into what  
217 microbiome activities resorcinol biosynthesis could be relevant to, however, some reported  
218 associations of the more specific chemical family of dialkylresorcinols include anti-inflammatory,

219 anti-proliferative, and antibiotic activities[31]. Interestingly, a dialkylresorcinol compound has  
220 been used to attenuate the effects of experimentally induced intestinal inflammation[32], which  
221 has potential implications for the observed higher prevalence of dialkylresorcinol-producing  
222 genomes in the inflammation-prone DNR mouse strain.

223         Considering the relatively modest costs of this sequencing experiment, we were  
224 surprised to find that the new sequences significantly helped with metagenomic read  
225 recruitment even in unrelated mouse lines and wild mouse samples, which have been shown to  
226 have more diverse microbiomes than their laboratory counterparts[33]. This corroborates prior  
227 reports demonstrating the value of SAG genomes as reference material for the interpretation of  
228 marine[34,35] and soil[12,36] microbiome omics data. The lack of improvement of the  
229 taxonomic classifiers on marine metagenomic data with mouse microbiome SAGs agree with  
230 our findings of novel genes, confirming the lack of highly similar genomes between these two  
231 environments.

232         Despite single-cell sequencing being a promising approach for increasing the  
233 representation of unculturable mouse symbionts in the tree of life, certain caveats still exist. For  
234 example, although the individual SAG assemblies have acceptable quality metrics, there is a  
235 limit to the completeness that can be achieved when operating with short read sequencing data.  
236 Long repetitive segments continue to pose an obstacle to assemblers that attempt to span  
237 ambiguous regions of the genome. Whole genome amplification, while drastically improved by  
238 the WGA-X process, is still not uniform across the genome, thus requiring a relatively deep  
239 sequencing of SAGs in order to access under-amplified regions. Despite these limitations, we  
240 expect that the taxonomic and functional novelty revealed in this study will encourage others to  
241 leverage single-cell genomics technologies.

242

## 243 Materials and Methods

### 244 Sample acquisition and sequencing

245 Cells were sequenced from three murine fecal pellets, two from wild-type C57BL/6N  
246 mice and one from an inflammatory bowel disease model CD4-dnTGFBR2 (DNR) [13,37]  
247 mouse not exhibiting intestinal pathology at the time of sampling. To preserve the mouse feces, a  
248 cryopreservation “glyTE” stock (11.11x) was made by mixing 20 mL of 100x Tris-EDTA pH 8.0  
249 (Sigma) with 60 mL deionized water and 100 mL molecular-grade glycerol (Acros Organics). This  
250 mixture was filter-sterilized using a 0.2 micrometer filter. Prior to use, 1x glyTE was made by diluting  
251 with phosphate buffered saline (PBS) at a 10:1 ratio. 1 mL of the 1x glyTE was then aliquoted into  
252 cryotubes. Each fecal pellet was distributed into 3 separate cryotubes to create 3 replicates for each  
253 sample. Each sample was dispersed into the solution by gentle pipetting and allowed to incubate at  
254 room temperature for 1 minute before being placed on dry ice. Samples were stored at -80 C and  
255 shipped on dry ice to the Bigelow Laboratory’s Single Cell Genomics Center for further processing  
256 using a previously described protocol[12]. Low-coverage SAG assemblies were generated to  
257 evaluate microbiome composition. Two samples, one of each murine host genotype, were  
258 selected for high-coverage sequencing. In each sample, cells were prioritized by optimizing for  
259 robust amplification profiles and maximizing the phylogenetic diversity (python code DOI:  
260 [10.5281/zenodo.2749707](https://doi.org/10.5281/zenodo.2749707)). The criterion used to assess amplification dynamics was computed  
261 as the time needed to reach the inflection point in the amplification curve. Raw reads were  
262 processed into assembled contigs (same procedure as described in [12]), which were further  
263 filtered to yield sufficient quality SAGs, which were assessed by checkM[38] for contamination  
264 and assigned a putative taxonomic lineage. Versions of QC and assembly pipeline  
265 subcomponents were as follows: SPAdes v3.9.0[39], bcl2fastq v2.17.1.14 (Illumina),  
266 Trimmomatic v0.32[40], kmernorm 1.05 (<https://sourceforge.net/projects/kmernorm/>). This SAG

267 generation, sequencing and assembly workflow was previously evaluated for assembly errors  
268 using three bacterial benchmark cultures with diverse genome complexity and GC content (%),  
269 indicating no non-target and undefined bases in the assemblies and average frequencies of  
270 mis-assemblies, indels and mismatches per 100 kbp being 0.9, 1.8, and 4.7[12].

271 All mice were housed and bred in specific pathogen-free conditions in the Gladstone  
272 animal facility. No animals were euthanized for the purposes of this study. All animal  
273 experiments were conducted with all relevant ethical regulations for animal testing and research  
274 and were done in accordance with guidelines set by the Institutional Animal Care and Use  
275 Committee of the University of California, San Francisco under protocol #AN151865–03A.

## 276 Computational analyses of phylogenetic placement and predicted 277 gene function

278 We used pplacer[41] within GTDB-Tk[17] to phylogenetically place the SAGs in the  
279 genome tree that is part of GTDB release 86. The resulting placements were used to calculate  
280 phylogenetic diversity and phylogenetic gain from the SAGs using GenomeTreeTk[42]. The heat  
281 tree visualization was inspired by the approach illustrated in the metacoder[43] R package and  
282 was ultimately generated alongside additional genomic feature annotation via the ggtree[44] and  
283 ggtreeExtra[45] packages.

284 Classification of the CRISPR-Cas system types and subtypes was done by  
285 CRISPRCasTyper v1.2.1[46]. Identification of secondary metabolism gene clusters was  
286 performed with AntiSMASH v5.2[47]. Unless otherwise stated, default settings were used when  
287 invoking these computational tools.

288 Clustering of predicted genes was performed by CD-HIT-EST v4.6.8 [48] (settings: `-r 1`  
289 `-c 0.95 -n 8`), and the resulting gene catalog was compared by CD-HIT-EST-2D to previously  
290 published gene catalogs derived from mouse[11], human[49], and marine[50] microbiomes. To

291 gauge enrichment of functional categories for novel sequences in our catalog, we annotated the  
292 sequences with EggNOG-mapper v1.0.3 [51] using diamond[52] as the homology search  
293 method and then applied Annotation Enrichment Analysis methodology[20] to assess the  
294 relationship between the number of genes assigned to a COG category and their novelty in  
295 relation to the previously published mouse metagenome catalog[11]. We corrected for multiple  
296 testing using the p.adjust function in base R[53] (v3.6.0), using the Benjamini-Hochberg[54]  
297 method.

## 298 Comparative analyses of metagenomic read recruitment

299 Custom sourmash[22] lowest common ancestor (LCA) databases for the set of GTDB  
300 genomes and SAG assemblies were created using the “sourmash lca index” function, and  
301 metagenomic datasets were then classified with “sourmash lca summarize” using the two  
302 databases separately as well as together to evaluate the effect of combining the data. To create  
303 the relevant databases for MIDAS, we used the built-in database creation script within the  
304 package, as well as an auxiliary step of assigning certain SAG assemblies to pre-existing  
305 genome clusters by computing their Mash[55] distance to extant cluster representatives.  
306 Comparative metagenomic datasets for wild mouse[33], lab mouse[11], human type I  
307 diabetes[56], healthy humans[57], and ocean samples[50] were retrieved from the SRA  
308 (accession IDs in S1 Table) and converted to fastq with NCBI’s fastq-dump utility. Metagenomic  
309 datasets from wild-type and DNR mice previously studied at the Gladstone Institutes[14] can be  
310 found under BioProject PRJNA397886. We used a paired Wilcoxon-rank test to evaluate the  
311 change in total hash recruitment by sourmash for the three pairs of reference database settings  
312 (default vs SAG-only, default vs combination, combination vs SAG-only). We also tested the  
313 difference in the number of species that were assigned more than 5 hashes, as an  
314 approximation for species prevalence. For MIDAS, we evaluated differences in median and

315 mean coverage of marker genes, as well as the species prevalence, using the unpaired  
316 Wilcoxon-rank test.

## 317 Data Availability

318 We submitted sequencing runs for 697 SAGs to SRA under BioProject PRJNA481120. Genome  
319 assemblies and feature annotations are available in a figshare repository (DOI:  
320 [10.6084/m9.figshare.c.4454150](https://doi.org/10.6084/m9.figshare.c.4454150))

321

## 322 Acknowledgments

323 We thank the staff of the Bigelow Laboratory Single Cell Genomics Center for the generation of  
324 single cell genomics data

## 325 Author contributions

326 F.W. and S.S. performed the mouse work and biological sample extraction. R.S. oversaw  
327 SAG generation and sequencing. S.L. performed the computational analyses and wrote the  
328 initial draft of the manuscript. K.S.P and R.S. advised and proposed extensions to the  
329 analyses. K.S.P. initiated the study. All authors read and approved the final manuscript.

## 330 References

- 331 1. Pasolli E, Asnicar F, Manara S, Zolfo M, Karcher N, Armanini F, et al. Extensive  
332 Unexplored Human Microbiome Diversity Revealed by Over 150,000 Genomes from  
333 Metagenomes Spanning Age, Geography, and Lifestyle. *Cell*. 2019;176: 649–662.e20.

- 334 doi:10.1016/j.cell.2019.01.001
- 335 2. Nayfach S, Shi ZJ, Seshadri R, Pollard KS, Kyrpides NC. New insights from uncultivated  
336 genomes of the global human gut microbiome. *Nature*. 2019;568: 505–510.  
337 doi:10.1038/s41586-019-1058-x
- 338 3. Parks DH, Rinke C, Chuvochina M, Chaumeil P-A, Woodcroft BJ, Evans PN, et al.  
339 Recovery of nearly 8,000 metagenome-assembled genomes substantially expands the tree  
340 of life. *Nature Microbiology*. 2017; 1. doi:10.1038/s41564-017-0012-7
- 341 4. Almeida A, Mitchell AL, Boland M, Forster SC, Gloor GB, Tarkowska A, et al. A new  
342 genomic blueprint of the human gut microbiota. *Nature*. 2019;568: 499–504.  
343 doi:10.1038/s41586-019-0965-1
- 344 5. Zou Y, Xue W, Luo G, Deng Z, Qin P, Guo R, et al. 1,520 reference genomes from  
345 cultivated human gut bacteria enable functional microbiome analyses. *Nat Biotechnol*.  
346 2019;37: 179–185. doi:10.1038/s41587-018-0008-8
- 347 6. Forster SC, Kumar N, Anonye BO, Almeida A, Viciani E, Stares MD, et al. A human gut  
348 bacterial genome and culture collection for improved metagenomic analyses. *Nat*  
349 *Biotechnol*. 2019;37: 186–192. doi:10.1038/s41587-018-0009-7
- 350 7. Browne HP, Forster SC, Anonye BO, Kumar N, Neville BA, Stares MD, et al. Culturing of  
351 “unculturable” human microbiota reveals novel taxa and extensive sporulation. *Nature*.  
352 2016;533: 543. Available: <https://www.nature.com/articles/nature17645>
- 353 8. Cross KL, Campbell JH, Balachandran M, Campbell AG, Cooper SJ, Griffen A, et al.  
354 Targeted isolation and cultivation of uncultivated bacteria by reverse genomics. *Nat*  
355 *Biotechnol*. 2019;37: 1314–1321. doi:10.1038/s41587-019-0260-6

- 356 9. Nayfach S, Rodriguez-Mueller B, Garud N, Pollard KS. An integrated metagenomics  
357 pipeline for strain profiling reveals novel patterns of bacterial transmission and  
358 biogeography. *Genome Res.* 2016;26: 1612–1625. doi:10.1101/gr.201863.115
- 359 10. Lagkouvardos I, Pukall R, Abt B, Foesel BU, Meier-Kolthoff JP, Kumar N, et al. The Mouse  
360 Intestinal Bacterial Collection (miBC) provides host-specific insight into cultured diversity  
361 and functional potential of the gut microbiota. *Nature Microbiology.* 2016;1: 16131.  
362 doi:10.1038/nmicrobiol.2016.131
- 363 11. Xiao L, Feng Q, Liang S, Sonne SB, Xia Z, Qiu X, et al. A catalog of the mouse gut  
364 metagenome. *Nat Biotechnol.* 2015;33: 1103–1108. doi:10.1038/nbt.3353
- 365 12. Stepanauskas R, Fergusson EA, Brown J, Poulton NJ, Tupper B, Labonté JM, et al.  
366 Improved genome recovery and integrated cell-size analyses of individual uncultured  
367 microbial cells and viral particles. *Nat Commun.* 2017;8: 84. doi:10.1038/s41467-017-  
368 00128-z
- 369 13. Gorelik L, Flavell RA. Abrogation of TGFbeta signaling in T cells leads to spontaneous T  
370 cell differentiation and autoimmune disease. *Immunity.* 2000;12: 171–181. doi:S1074-  
371 7613(00)80170-3 [pii]
- 372 14. Sharpton T, Lyalina S, Luong J, Pham J, Deal EM, Armour C, et al. Development of  
373 inflammatory bowel disease is linked to a longitudinal restructuring of the gut metagenome  
374 in mice. *mSystems.* 2017;2. doi:10.1128/mSystems.00036-17
- 375 15. Woyke T, Xie G, Copeland A, González JM, Han C, Kiss H, et al. Assembling the marine  
376 metagenome, one cell at a time. *PLoS One.* 2009;4: e5299.  
377 doi:10.1371/journal.pone.0005299
- 378 16. Dean FB, Hosono S, Fang L, Wu X, Faruqi AF, Bray-Ward P, et al. Comprehensive human



- 379 genome amplification using multiple displacement amplification. *Proc Natl Acad Sci U S A*.  
380 2002;99: 5261–5266. doi:10.1073/pnas.082089499
- 381 17. Chaumeil P-A, Mussig AJ, Hugenholtz P, Parks DH. GTDB-Tk: a toolkit to classify  
382 genomes with the Genome Taxonomy Database. *Bioinformatics*. 2019.  
383 doi:10.1093/bioinformatics/btz848
- 384 18. Parks DH, Chuvochina M, Waite DW, Rinke C, Skarszewski A, Chaumeil P-A, et al. A  
385 standardized bacterial taxonomy based on genome phylogeny substantially revises the tree  
386 of life. *Nature Biotechnology*. 2018;36: 996. doi:10.1038/nbt.4229
- 387 19. Galperin MY, Makarova KS, Wolf YI, Koonin EV. Expanded Microbial genome coverage  
388 and improved protein family annotation in the COG database. *Nucleic Acids Res*. 2015;43:  
389 D261–D269. doi:10.1093/nar/gku1223
- 390 20. Glass K, Girvan M. Annotation enrichment analysis: an alternative method for evaluating  
391 the functional properties of gene sets. *Sci Rep*. 2014;4: 4191. doi:10.1038/srep04191
- 392 21. Schöner TA, Gassel S, Osawa A, Tobias NJ, Okuno Y, Sakakibara Y, et al. Aryl Polyenes,  
393 a Highly Abundant Class of Bacterial Natural Products, Are Functionally Related to  
394 Antioxidative Carotenoids. *Chembiochem*. 2016;17: 247–253. doi:10.1002/cbic.201500474
- 395 22. Titus Brown C, Irber L. sourmash: a library for MinHash sketching of DNA. *The Journal of*  
396 *Open Source Software*. 2016;1: 27. doi:10.21105/joss.00027
- 397 23. Ormerod KL, Wood DLA, Lachner N, Gellatly SL, Daly JN, Parsons JD, et al. Genomic  
398 characterization of the uncultured Bacteroidales family S24-7 inhabiting the guts of  
399 homeothermic animals. *Microbiome*. 2016;4: 36. doi:10.1186/s40168-016-0181-2
- 400 24. Lagkouvardos I, Lesker TR, Hitch TCA, Gálvez EJC, Smit N, Neuhaus K, et al. Sequence

- 401 and cultivation study of Muribaculaceae reveals novel species, host preference, and  
402 functional potential of this yet undescribed family. *Microbiome*. 2019;7: 28.  
403 doi:10.1186/s40168-019-0637-2
- 404 25. Starke RM, McCarthy DJ, Komotar RJ, Connolly ES. Gut Microbiome and Endothelial TLR4  
405 Activation Provoke Cerebral Cavernous Malformations. *Neurosurgery*. 2017;81: N44–N46.  
406 doi:10.1093/neuros/nyx450
- 407 26. Krych Ł, Nielsen DS, Hansen AK, Hansen C. Gut microbial markers are associated with  
408 diabetes onset, regulatory imbalance, and IFN- $\gamma$  level in NOD Mice. *Gut Microbes*. 2015;6:  
409 101–109. doi:10.1080/19490976.2015.1011876
- 410 27. Harach T, Marungruang N, Duthilleul N, Cheatham V, Mc Coy KD, Frisoni G, et al.  
411 Reduction of Abeta amyloid pathology in APPPS1 transgenic mice in the absence of gut  
412 microbiota. *Sci Rep*. 2017;7: 41802. doi:10.1038/srep41802
- 413 28. Iljazovic A, Roy U, Gálvez EJC, Lesker TR, Zhao B, Gronow A, et al. Perturbation of the gut  
414 microbiome by *Prevotella* spp. enhances host susceptibility to mucosal inflammation.  
415 *Mucosal Immunol*. 2021;14: 113–124. doi:10.1038/s41385-020-0296-4
- 416 29. Alneberg J, Karlsson CMG, Divne A-M, Bergin C, Homa F, Lindh MV, et al. Genomes from  
417 uncultivated prokaryotes: a comparison of metagenome-assembled and single-amplified  
418 genomes. *Microbiome*. 2018;6: 173. doi:10.1186/s40168-018-0550-0
- 419 30. Samai P, Pyenson N, Jiang W, Goldberg GW, Hatoum-Aslan A, Marraffini LA. Co-  
420 transcriptional DNA and RNA Cleavage during Type III CRISPR-Cas Immunity. *Cell*.  
421 2015;161: 1164–1174. doi:10.1016/j.cell.2015.04.027
- 422 31. Schöner TA, Kresovic D, Bode HB. Biosynthesis and function of bacterial dialkylresorcinol  
423 compounds. *Appl Microbiol Biotechnol*. 2015;99: 8323–8328. doi:10.1007/s00253-015-

424 6905-6

425 32. Forbes E, Murase T, Yang M, Matthaei KI, Lee JJ, Lee NA, et al. Immunopathogenesis of  
426 experimental ulcerative colitis is mediated by eosinophil peroxidase. *J Immunol.* 2004;172:  
427 5664–5675. Available: <https://www.ncbi.nlm.nih.gov/pubmed/15100311>

428 33. Rosshart SP, Vassallo BG, Angeletti D, Hutchinson DS, Morgan AP, Takeda K, et al. Wild  
429 Mouse Gut Microbiota Promotes Host Fitness and Improves Disease Resistance. *Cell.*  
430 2017;171: 1015–1028.e13. doi:10.1016/j.cell.2017.09.016

431 34. Pachiadaki MG, Brown JM, Brown J, Bezuidt O, Berube PM, Biller SJ, et al. Charting the  
432 Complexity of the Marine Microbiome through Single-Cell Genomics. *Cell.* 2019;179: 1623–  
433 1635.e11. doi:10.1016/j.cell.2019.11.017

434 35. Swan BK, Tupper B, Sczyrba A, Lauro FM, Martinez-Garcia M, González JM, et al.  
435 Prevalent genome streamlining and latitudinal divergence of planktonic bacteria in the  
436 surface ocean. 2013. pp. 11463–11468. doi:10.1073/pnas.1304246110

437 36. Choi J, Yang F, Stepanauskas R, Cardenas E, Garoutte A, Williams R, et al. Strategies to  
438 improve reference databases for soil microbiomes. *ISME J.* 2017;11: 829–834.  
439 doi:10.1038/ismej.2016.168

440 37. Sanjabi S, Flavell RA. Overcoming the hurdles in using mouse genetic models that block  
441 TGF- $\beta$  signaling. *J Immunol Methods.* 2010;353: 111–114. doi:10.1016/j.jim.2009.12.008

442 38. Parks DH, Imelfort M, Skennerton CT, Hugenholtz P, Tyson GW. CheckM: assessing the  
443 quality of microbial genomes recovered from. Cold Spring Harbor Laboratory Press  
444 *Method.* 2015;1: 1–31. doi:10.1101/gr.186072.114

445 39. Bankevich A, Nurk S, Antipov D, Gurevich AA, Dvorkin M, Kulikov AS, et al. SPAdes: A

- 446 New Genome Assembly Algorithm and Its Applications to Single-Cell Sequencing. *J*  
447 *Comput Biol.* 2012;19: 455–477. doi:10.1089/cmb.2012.0021
- 448 40. Bolger AM, Lohse M, Usadel B. Trimmomatic: a flexible trimmer for Illumina sequence data.  
449 *Bioinformatics.* 2014;30: 2114–2120. doi:10.1093/bioinformatics/btu170
- 450 41. Matsen FA, Kodner RB, Armbrust EV. pplacer: linear time maximum-likelihood and  
451 Bayesian phylogenetic placement of sequences onto a fixed reference tree. *BMC*  
452 *Bioinformatics.* 2010;11: 538. doi:10.1186/1471-2105-11-538
- 453 42. Parks DH. GenomeTreeTk. [cited 8 Dec 2018]. Available:  
454 <https://github.com/dparks1134/GenomeTreeTk>
- 455 43. Foster ZSL, Sharpton TJ, Grünwald NJ. Metacoder: An R package for visualization and  
456 manipulation of community taxonomic diversity data. *PLoS Comput Biol.* 2017;13.  
457 doi:10.1371/journal.pcbi.1005404
- 458 44. Yu G, Smith DK, Zhu H, Guan Y, Lam TTY. ggtree: an r package for visualization and  
459 annotation of phylogenetic trees with their covariates and other associated data. *Methods*  
460 *Ecol Evol.* 2017;8: 28–36. doi:10.1111/2041-210X.12628
- 461 45. Xu S, Dai Z, Guo P, Fu X, Liu S, Zhou L, et al. ggtreeExtra: Compact Visualization of Richly  
462 Annotated Phylogenetic Data. *Mol Biol Evol.* 2021;38: 4039–4042.  
463 doi:10.1093/molbev/msab166
- 464 46. Russel J, Pinilla-Redondo R, Mayo-Muñoz D, Shah SA, Sørensen SJ. CRISPRCasTyper:  
465 An automated tool for the identification, annotation and classification of CRISPR-Cas loci.  
466 *bioRxiv.* 2020. p. 2020.05.15.097824. doi:10.1101/2020.05.15.097824
- 467 47. Blin K, Shaw S, Steinke K, Villebro R, Ziemert N, Lee SY, et al. antiSMASH 5.0: updates to

- 468 the secondary metabolite genome mining pipeline. *Nucleic Acids Res.* 2019;47: W81–W87.  
469 doi:10.1093/nar/gkz310
- 470 48. Fu L, Niu B, Zhu Z, Wu S, Li W. CD-HIT: Accelerated for clustering the next-generation  
471 sequencing data. *Bioinformatics.* 2012;28: 3150–3152. doi:10.1093/bioinformatics/bts565
- 472 49. Li J, Jia H, Cai X, Zhong H, Feng Q, Sunagawa S, et al. An integrated catalog of reference  
473 genes in the human gut microbiome. *Nat Biotechnol.* 2014;32: 834–841.  
474 doi:10.1038/nbt.2942
- 475 50. Sunagawa S, Coelho LP, Chaffron S, Kultima JR, Labadie K, Salazar G, et al. Structure  
476 and function of the global ocean microbiome. *Science.* 2015;348.  
477 doi:10.1126/science.1261359
- 478 51. Huerta-Cepas J, Szklarczyk D, Forslund K, Cook H, Heller D, Walter MC, et al. EGGNOG  
479 4.5: A hierarchical orthology framework with improved functional annotations for eukaryotic,  
480 prokaryotic and viral sequences. *Nucleic Acids Res.* 2016;44: D286–D293.  
481 doi:10.1093/nar/gkv1248
- 482 52. Buchfink B, Xie C, Huson DH. Fast and sensitive protein alignment using DIAMOND. *Nat*  
483 *Methods.* 2014;12: 59–60. doi:10.1038/nmeth.3176
- 484 53. R Foundation for Statistical Computing. R: A Language and Environment for Statistical  
485 Computing. R Foundation for Statistical Computing. 2016. doi:10.1007/978-3-540-74686-7
- 486 54. Benjamini Y, Hochberg Y. Controlling the False Discovery Rate: A Practical and Powerful  
487 Approach to Multiple Testing. *J R Stat Soc Series B Stat Methodol.* 1995;57: 289–300.  
488 doi:10.2307/2346101
- 489 55. Ondov BD, Treangen TJ, Melsted P, Mallonee AB, Bergman NH, Koren S, et al. Mash: fast

490 genome and metagenome distance estimation using MinHash. *Genome Biol.* 2016;17: 132.  
491 doi:10.1186/s13059-016-0997-x

492 56. Heintz-Buschart A, May P, Laczny CC, Lebrun LA, Bellora C, Krishna A, et al. Integrated  
493 multi-omics of the human gut microbiome in a case study of familial type 1 diabetes. *Nature*  
494 *Microbiology.* 2016;2. doi:10.1038/nmicrobiol.2016.180

495 57. Human Microbiome Project Consortium. Structure, function and diversity of the healthy  
496 human microbiome. *Nature.* 2012;486: 207–214. doi:10.1038/nature11234

497

498

## 499 Captions for Supporting Information

500 **S1 Fig. Assembly quality improvement with high coverage sequencing.** Multiple metrics  
501 are improved when comparing high coverage versus low coverage single cell sequencing data.  
502 Facets show the individual metrics assessed: assembly completeness as determined by  
503 CheckM, total length of the genome assembly, maximum contig length, total number of reads  
504 generated . Numbers over each boxplot represent p-values of paired Mann-Whitney tests.

505 **S2 Table. Accessions used for taxonomic classifier performance evaluation.** Public data  
506 retrieved from SRA and ENA to test the performance of metagenomic classifiers with custom  
507 reference databases.

508 **S3 Table. Results of nonparametric comparisons of taxonomic classifier performance**  
509 **with varying reference databases.** Results of Mann-Whitney tests comparing metagenomic  
510 read recruitment metrics for every combination of reference type (default, single-cell genomes

511 only, combined) and test dataset. Two sheets are present in the file, reflecting the results from  
512 two different taxonomic classifiers (sourmash and MIDAS)

513 **S4 Fig. Distributions of taxonomic classifier performance metrics when using the**  
514 **taxonomic classifier sourmash and varying reference databases.** Ridgeline plots  
515 representing distributions of 2 metagenomic classifier performance metrics when using  
516 sourmash - total number of kmer hashes assigned and number of species with more than 5  
517 hashes (an approximation for prevalence). The plots are faceted by dataset, and each line  
518 within the facet reflects one of the three reference database options - default set of genomes  
519 available in GTDB release 86, a custom database with single-cell genomes only, and a  
520 combined database with the GTDB v86 and single-cell genomes.

521 **S5 Fig. Distributions of taxonomic classifier performance metrics when using the**  
522 **taxonomic classifier MIDAS and varying reference databases.** Ridgeline plots representing  
523 distributions of 3 metagenomic classifier performance metrics when using MIDAS - mean  
524 coverage of 15 phylogenetically informative marker genes, median coverage of the same  
525 genes, and prevalence (number of samples a species is present in). The plots are faceted by  
526 dataset, and each line within the facet reflects one of the three reference database options -  
527 default MIDAS v1.2 database, a custom database with single-cell genomes only, and a  
528 combined database with the MIDAS v1.2 and single cell genomes.

529

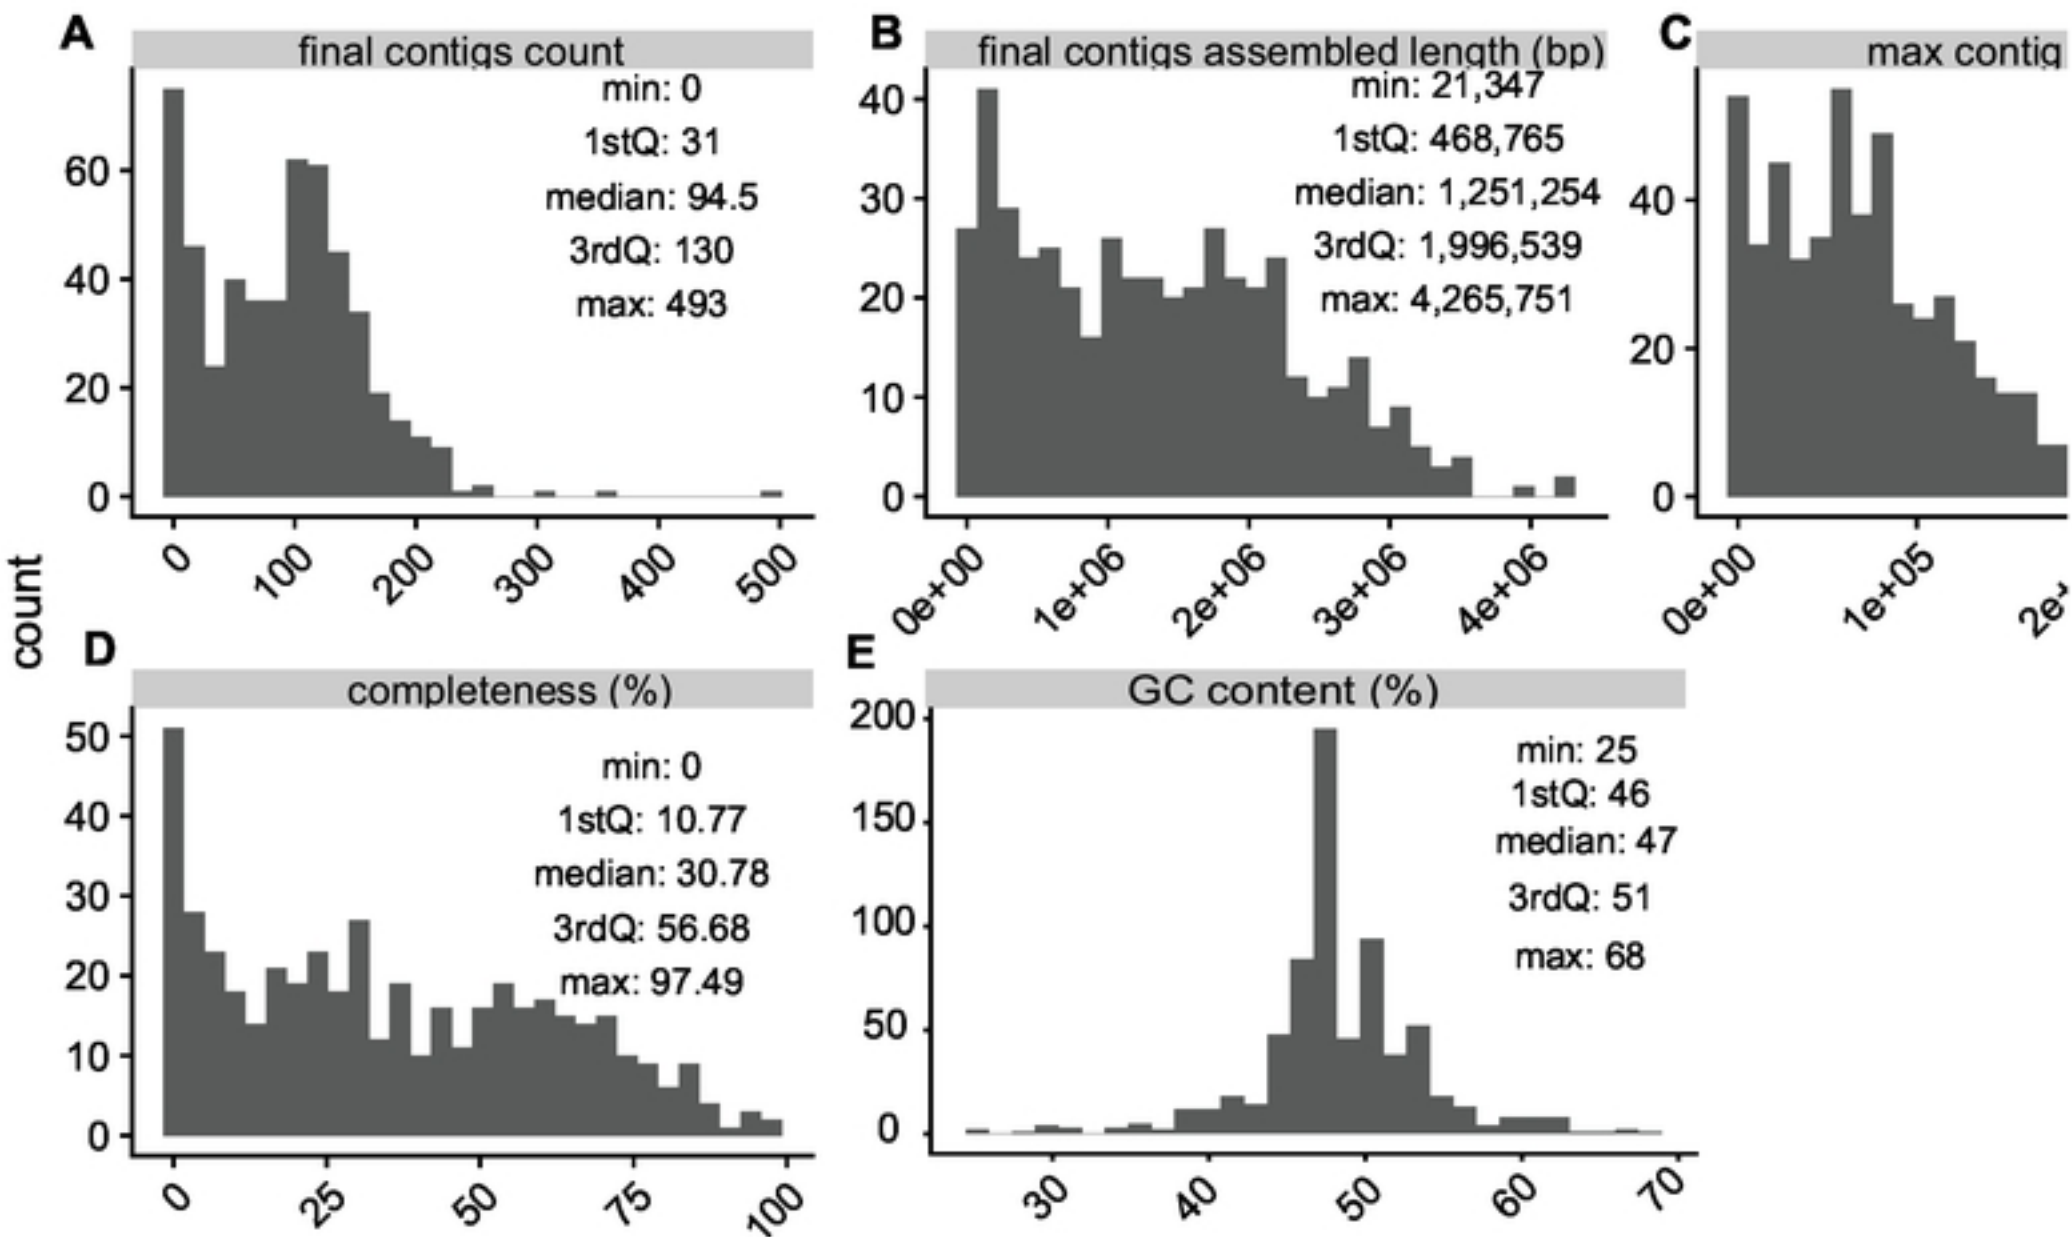

Figure 1



## Inner tree legend

Number of SAG asse  
placed at or below nc

- 50
- 100
- 150
- 200
- 250

## Outer rings lege

Host Genotype

- DNR ○ WT

Predicted CRISPR-

- I-B ■ II-C
- I-C ★ III-A
- ▲ I-E ✕ III-D
- + II-A

Predicted biosynthe

- |               |   |
|---------------|---|
| ■ arylpolyene | ■ |
| ■ bacteriocin | ■ |
| ■ betalactone | ■ |
| ■ fatty_acid  | ■ |
| ■ halogenated | ■ |
| ■ ladderane   | ■ |

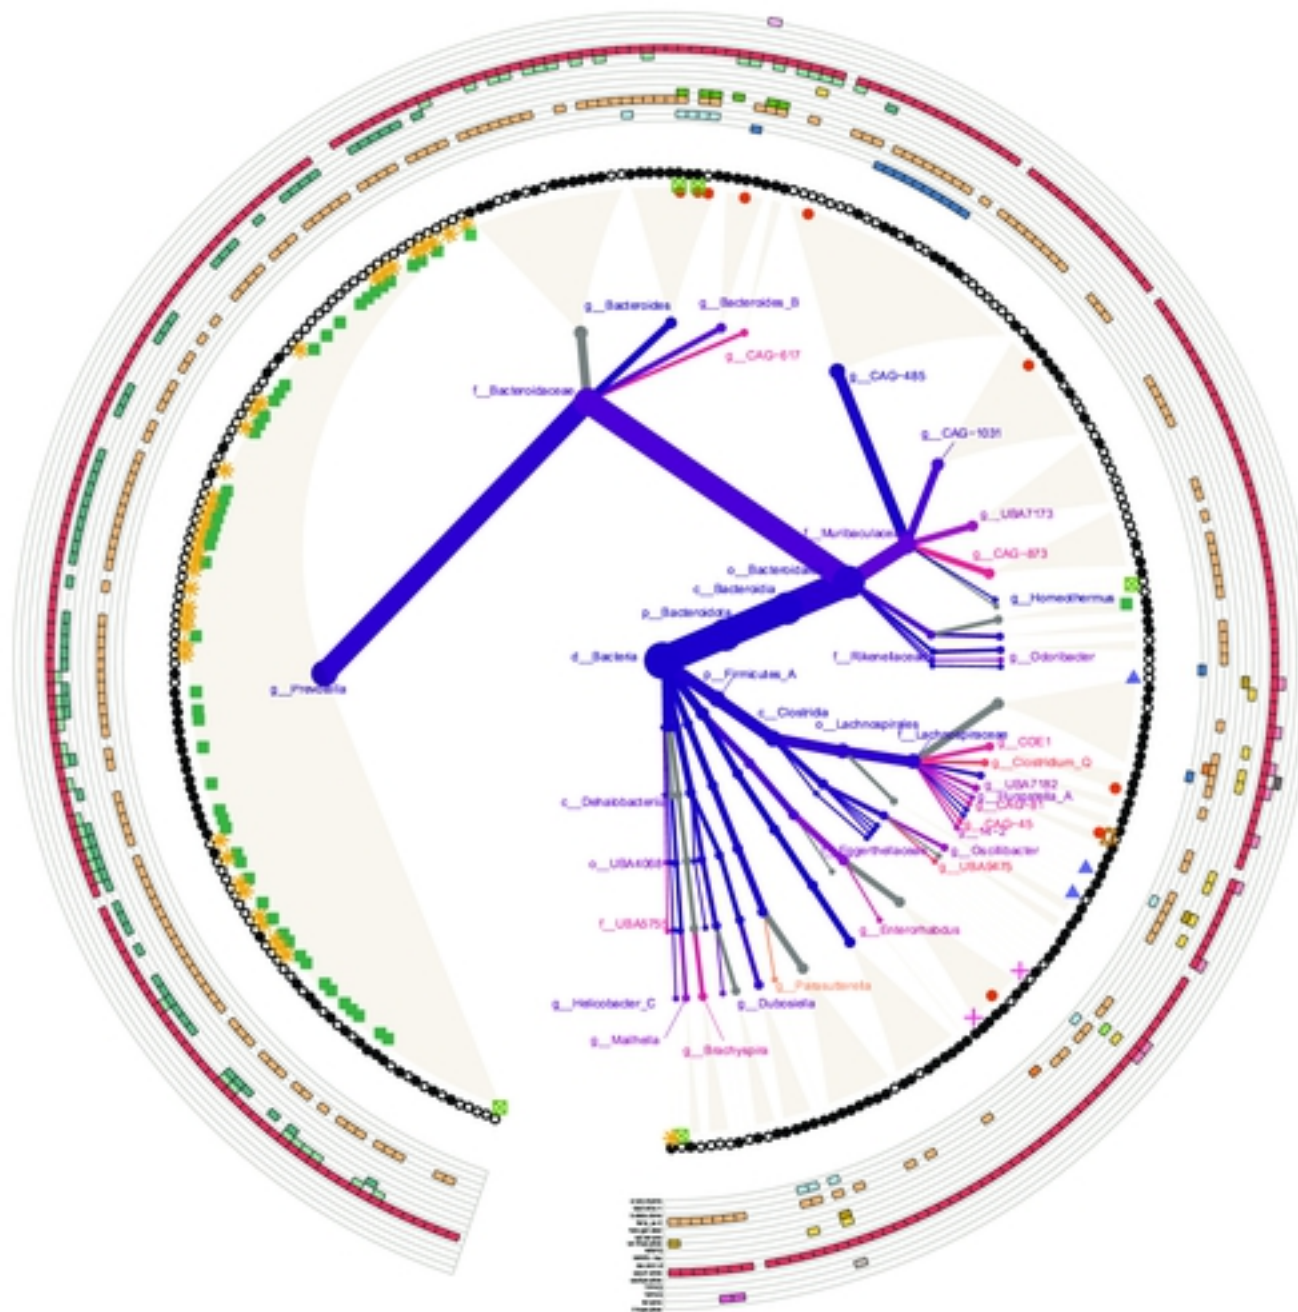

Figure 2

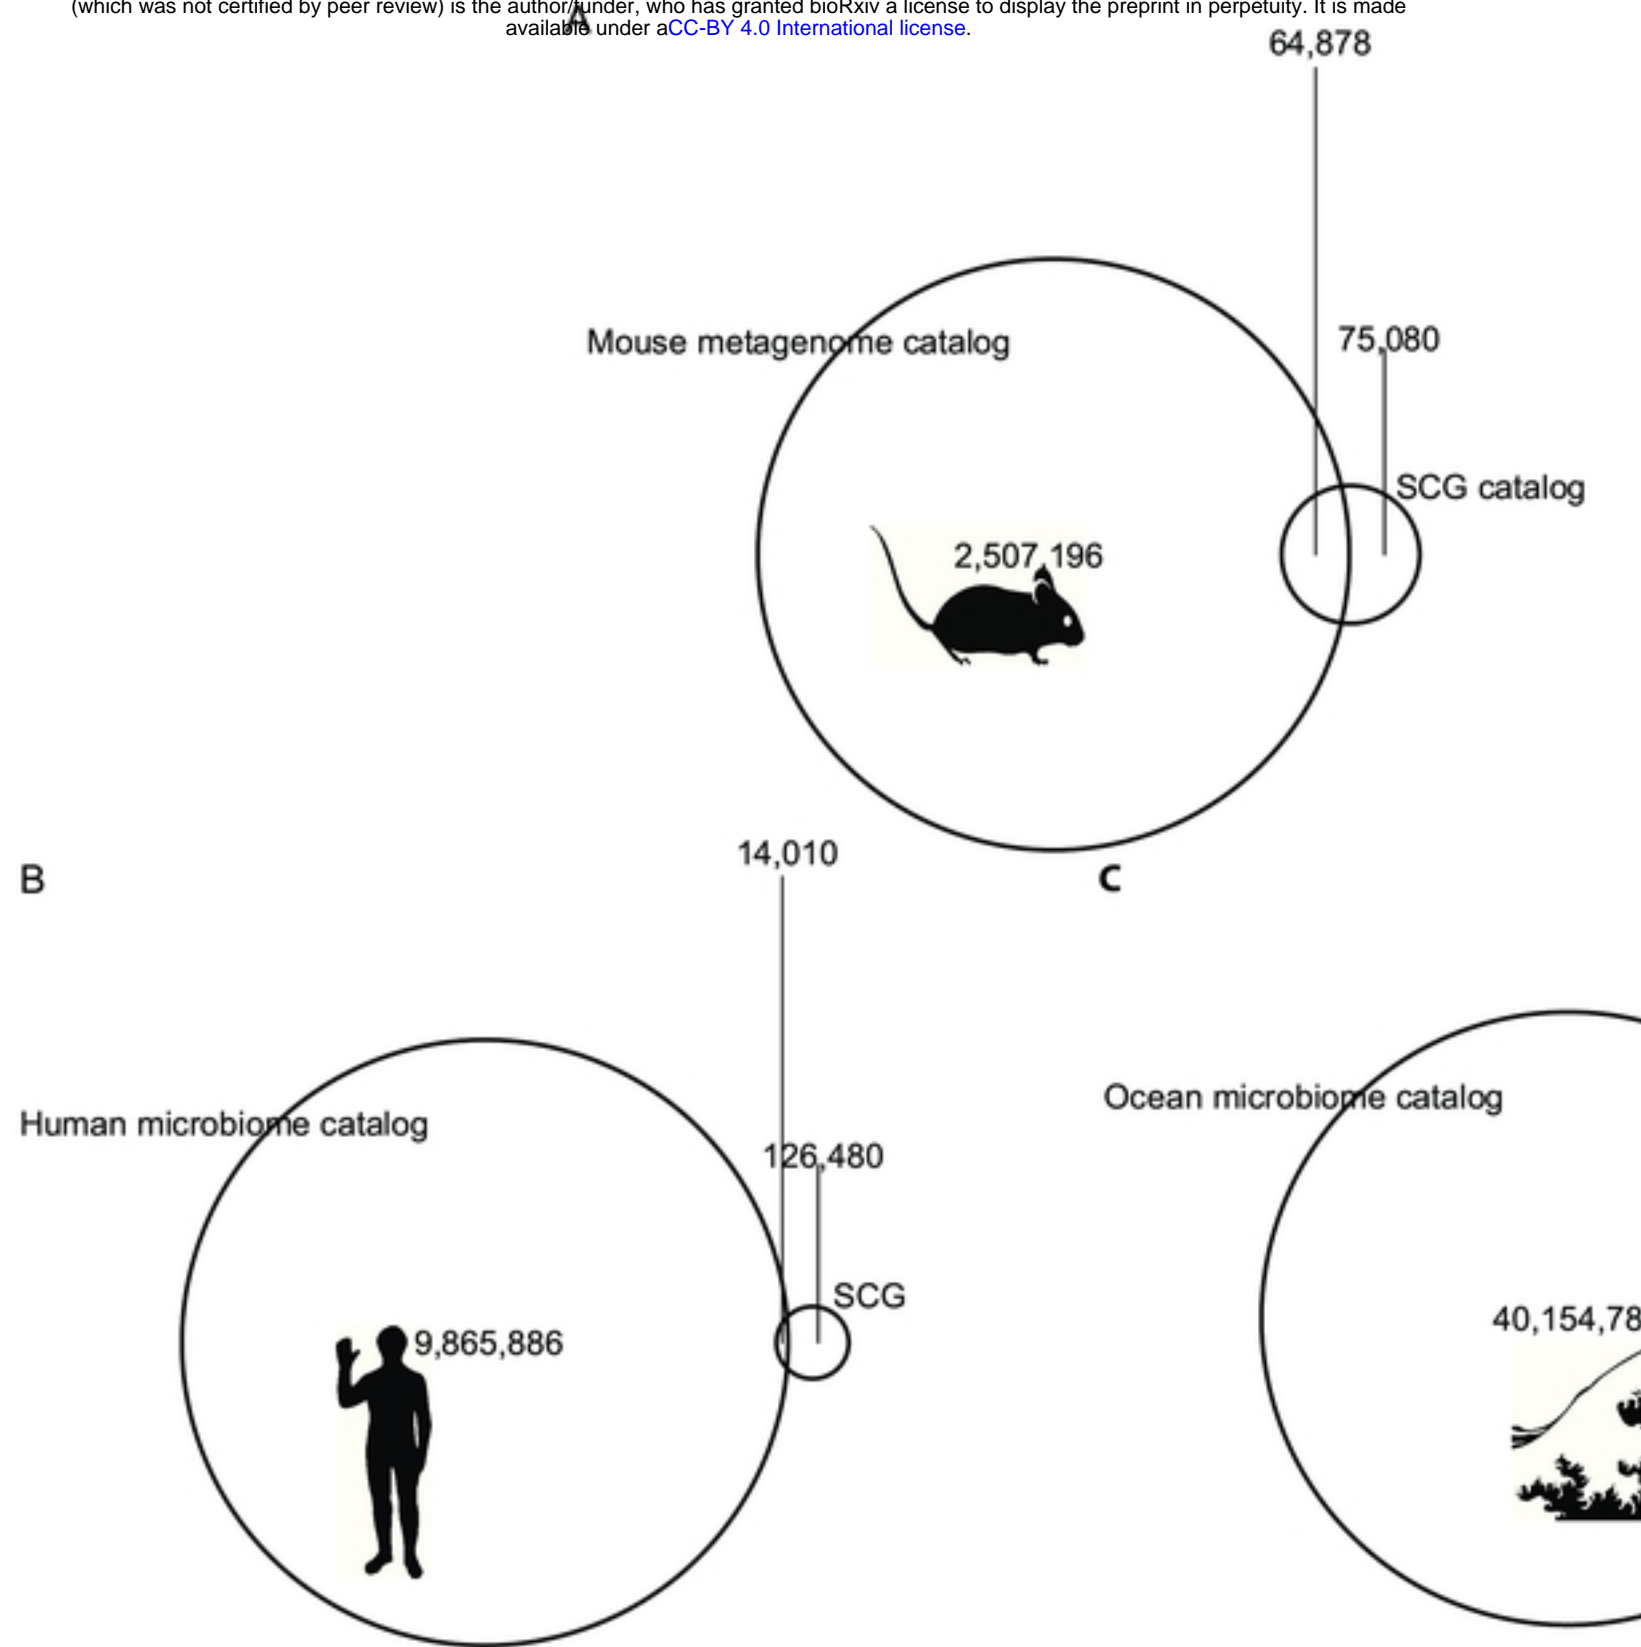

Figure 3
